# Supplementary material for: Exploring the Diversity of Fungal DyPs in Mangrove Soils to Produce and Characterize Novel Biocatalysts
Source: MDPI journal article supplement (doi:10.3390/jof7050321), 2021-04-21
Supplement: s1 [file s1]

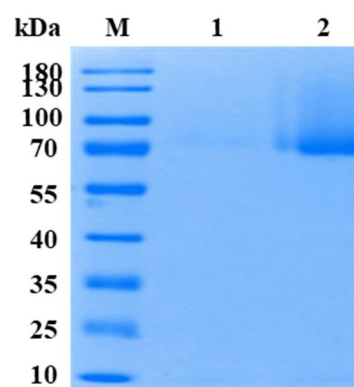

**Figure S1.** SDS-PAGE of the two-step purification for the recombinant DyP1 produced in *Pichia pastoris*. Lanes: 1, culture medium fraction; 2, purified DyP1 obtained after IMAC chromatography and M, protein molecular mass markers.
